# Supplementary material
Source: PubMed Central journal article supplement (PMC8984882)
Supplement: ajcr0012-1222-f13.pdf [file ajcr0012-1222-f13.pdf]

## A combined immune-hypoxia model for predicting BRCA radiosensitivity

**Table S1.** Clinicopathologic characteristics of breast cancer in the TCGA dataset

| Characteristic     | TCGA                 |                      | P value |
|--------------------|----------------------|----------------------|---------|
|                    | RT (n=540)           | NRT (n=406)          |         |
| Age                |                      |                      |         |
| <60                | 305 (56.48%)         | 203 (50%)            | 0.048   |
| ≥60                | 235 (43.52%)         | 203 (50%)            |         |
| Histological type  |                      |                      |         |
| Lobular Carcinoma  | 110 (20.37%)         | 79 (19.46%)          | 0.218   |
| Ductal Carcinoma   | 387 (71.67%)         | 281 (69.21%)         |         |
| Mixed              | 16 (2.96%)           | 11 (2.71%)           |         |
| Others             | 27 (5%)              | 34 (8.37%)           |         |
| NA                 | 0                    | 1 (0.25%)            |         |
| Pathological stage |                      |                      |         |
| I/II               | 366 (67.78%)         | 329 (81.03%)         | <0.001  |
| III/IV             | 165 (30.56%)         | 67 (16.5%)           |         |
| NA                 | 9 (1.67%)            | 10 (2.46%)           |         |
| ER                 |                      |                      |         |
| ER-                | 111 (20.56%)         | 91 (22.41%)          | 0.504   |
| ER+                | 406 (75.19%)         | 299 (73.65%)         |         |
| NA                 | 23 (4.26%)           | 16 (3.94%)           |         |
| PR                 |                      |                      |         |
| PR-                | 167 (30.93%)         | 125 (30.79%)         | 0.978   |
| PR+                | 350 (64.81%)         | 263 (64.78%)         |         |
| NA                 | 23 (4.26%)           | 18 (4.43%)           |         |
| HER2               |                      |                      |         |
| HER2-              | 280 (51.85%)         | 197 (48.52%)         | 0.141   |
| HER2+/-            | 66 (12.22%)          | 68 (16.75%)          |         |
| HER2+              | 105 (19.44%)         | 76 (18.72%)          |         |
| NA                 | 89 (16.48%)          | 65 (16.01%)          |         |
| Chemotherapy       |                      |                      |         |
| No                 | 26 (4.81%)           | 62 (15.27%)          | <0.001  |
| Yes                | 486 (90%)            | 282 (69.46%)         |         |
| NA                 | 28 (5.19%)           | 62 (15.27%)          |         |
| Status             |                      |                      |         |
| alive              | 491 (90.93%)         | 348 (85.71%)         | 0.012   |
| death              | 49 (9.07%)           | 58 (14.29%)          |         |
| SurvTime (month)*  | 32.49 (18.61, 63.25) | 23.98 (13.47, 52.13) | <0.001  |

\*P50(P25, P75); RT, radiotherapy; NRT, non-radiotherapy; NA, data not available; ER, estrogen receptor; PR, progesterone receptor; HER2, human epidermal growth factor receptor 2.

**Table S2.** Clinicopathologic characteristics of breast cancer in the METABRIC dataset

| Characteristic    | METABRIC     |              | P value |
|-------------------|--------------|--------------|---------|
|                   | RT (n=1137)  | NRT (n=764)  |         |
| Age               |              |              |         |
| <60               | 555 (48.81%) | 285 (37.3%)  | <0.001  |
| ≥60               | 582 (51.19%) | 479 (62.7%)  |         |
| Histological type |              |              |         |
| Lobular Carcinoma | 75 (6.6%)    | 67 (8.77%)   | 0.144   |
| Ductal Carcinoma  | 885 (77.84%) | 566 (74.08%) |         |
| Mixed             | 115 (10.11%) | 92 (12.04%)  |         |
| Others            | 53 (4.66%)   | 33 (4.32%)   |         |

## A combined immune-hypoxia model for predicting BRCA radiosensitivity

|                   |                        |                        |        |
|-------------------|------------------------|------------------------|--------|
| NA                | 9 (0.79%)              | 6 (0.79%)              |        |
| Grade             |                        |                        |        |
| I                 | 82 (7.21%)             | 82 (10.73%)            | <0.001 |
| II                | 402 (35.36%)           | 338 (44.24%)           |        |
| III               | 627 (55.15%)           | 299 (39.14%)           |        |
| NA                | 26 (2.29%)             | 45 (5.89%)             |        |
| ER                |                        |                        |        |
| ER-               | 305 (26.82%)           | 138 (18.06%)           | <0.001 |
| ER+               | 832 (73.18%)           | 626 (81.94%)           |        |
| PR                |                        |                        |        |
| PR-               | 562 (49.43%)           | 331 (43.32%)           | 0.009  |
| PR+               | 575 (50.57%)           | 433 (56.68%)           |        |
| HER2              |                        |                        |        |
| HER2-             | 990 (87.07%)           | 675 (88.35%)           | 0.407  |
| HER2+             | 147 (12.93%)           | 89 (11.65%)            |        |
| Chemotherapy      |                        |                        |        |
| No                | 814 (71.59%)           | 691 (90.45%)           | <0.001 |
| Yes               | 323 (28.41%)           | 73 (9.55%)             |        |
| Status            |                        |                        |        |
| alive             | 530 (46.61%)           | 269 (35.21%)           | <0.001 |
| death             | 607 (53.39%)           | 495 (64.79%)           |        |
| SurvTime (month)* | 116.63 (61.33, 182.93) | 114.28 (60.89, 186.88) | 0.818  |

\*P50(P25, P75); RT, radiotherapy; NRT, non-radiotherapy; NA, data not available; ER, estrogen receptor; PR, progesterone receptor; HER2, human epidermal growth factor receptor 2.

**Table S3.** Clinicopathologic characteristics of breast cancer in the E-TABM-158 dataset

| Characteristic     | E-TABM-158            |                       | P value |
|--------------------|-----------------------|-----------------------|---------|
|                    | RT (n=59)             | NRT (n=56)            |         |
| Age                |                       |                       |         |
| <60                | 42 (71.19%)           | 36 (64.29%)           | 0.429   |
| ≥60                | 17 (28.81%)           | 20 (35.71%)           |         |
| Pathological stage |                       |                       |         |
| I/II               | 48 (81.36%)           | 45 (80.36%)           | 0.936   |
| III/IV             | 10 (16.95%)           | 9 (16.07%)            |         |
| NA                 | 1 (1.69%)             | 2 (3.57%)             |         |
| ER                 |                       |                       |         |
| ER-                | 24 (40.68%)           | 19 (33.93%)           | 0.455   |
| ER+                | 35 (59.32%)           | 37 (66.07%)           |         |
| PR                 |                       |                       |         |
| PR-                | 26 (44.07%)           | 25 (44.64%)           | 0.984   |
| PR+                | 32 (54.24%)           | 31 (55.36%)           |         |
| NA                 | 1 (1.69%)             | 0                     |         |
| Chemotherapy       |                       |                       |         |
| No                 | 25 (42.37%)           | 29 (51.79%)           | 0.312   |
| Yes                | 34 (57.63%)           | 27 (48.21%)           |         |
| DSS                |                       |                       |         |
| alive              | 44 (74.58%)           | 44 (78.57%)           | 0.613   |
| death              | 15 (25.42%)           | 12 (21.43%)           |         |
| SurvTime (month)*  | 81.12 (45.18, 117.90) | 72.60 (36.06, 108.84) | 0.339   |

\*P50(P25, P75); RT, radiotherapy; NRT, non-radiotherapy; NA, data not available; ER, estrogen receptor; PR, progesterone receptor; DSS, disease-specific survival.

# A combined immune-hypoxia model for predicting BRCA radiosensitivity

**Table S4.** Clinicopathologic characteristics of breast cancer in the GSE103746 dataset

| Characteristic          | GSE103746              |                        | P value |
|-------------------------|------------------------|------------------------|---------|
|                         | RT (n=118)             | NRT (n=54)             |         |
| ER                      |                        |                        |         |
| ER-                     | 38 (32.20%)            | 12 (22.22%)            | 0.181   |
| ER+                     | 80 (67.80%)            | 42 (77.78%)            |         |
| NA                      |                        |                        |         |
| Reference               |                        |                        |         |
| no                      | 68 (57.63%)            | 36 (66.67%)            | 0.261   |
| yes                     | 50 (42.37%)            | 18 (33.33%)            |         |
| Follow-up time (month)* | 104.89 (46.46, 166.07) | 132.44 (61.60, 180.70) | 0.373   |

\*P50(P25, P75); RT, radiotherapy; NRT, non-radiotherapy.

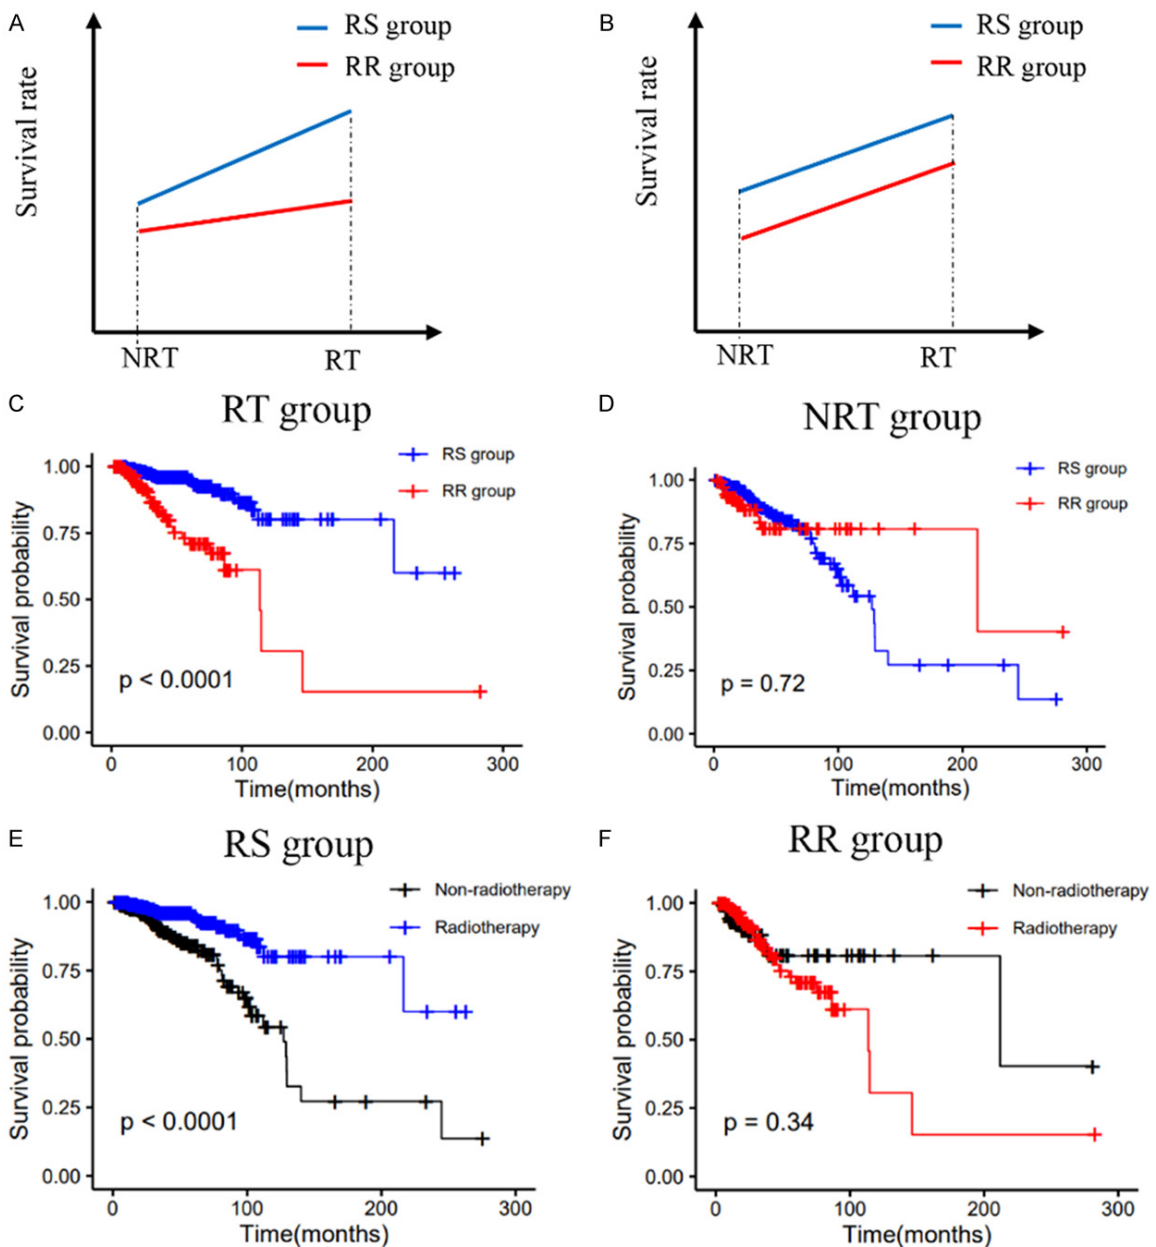

**Figure S1.** Definition of radiosensitivity and radiosensitivity gene signature.

## A combined immune-hypoxia model for predicting BRCA radiosensitivity

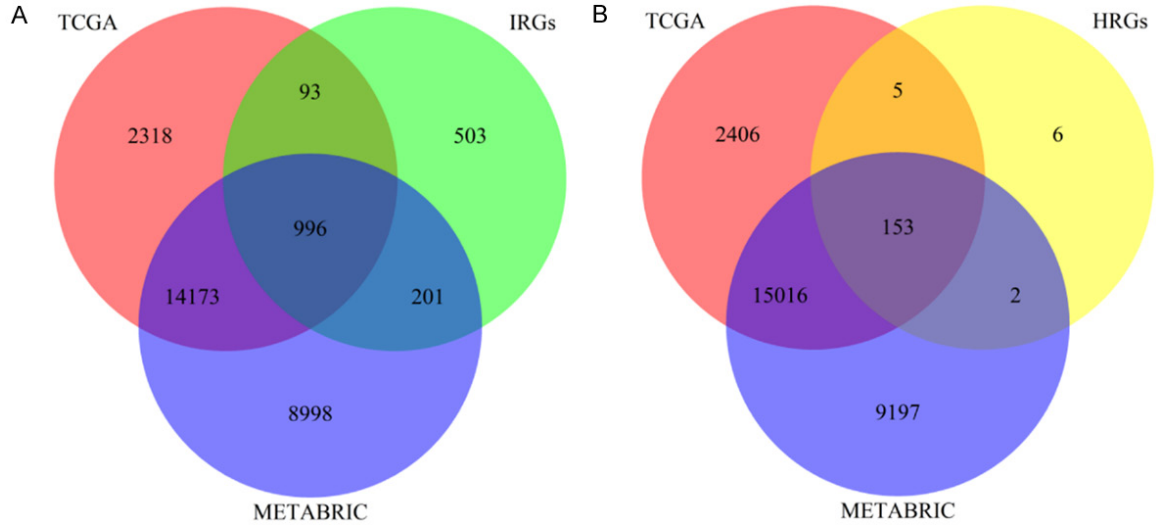

**Figure S2.** Venn diagram. The common immune-related genes (A) and hypoxia-related genes; (B) in the TCGA dataset, METABRIC datasets.

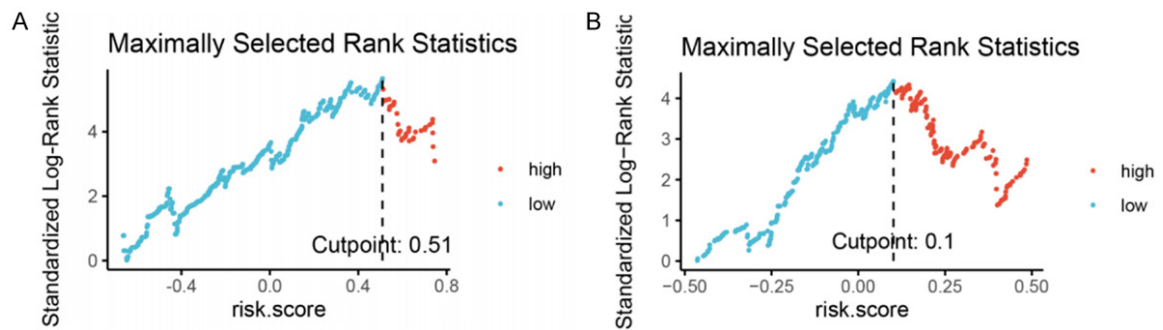

**Figure S3.** The optional cutoff values were determined by maximally selected rank statistics. A. Immune signature; B. Hypoxia signature.

**Table S5.** Univariate Cox regression analysis of radiotherapy and non-radiotherapy patients in the TCGA dataset

| Gene names  | Radiotherapy for all patients |         | Non-radiotherapy for all patients |         |
|-------------|-------------------------------|---------|-----------------------------------|---------|
|             | HR (95% CI)                   | P value | HR (95% CI)                       | P value |
| <b>IRGs</b> |                               |         |                                   |         |
| ACVRL1      | 1.371 (1.139-1.649)           | 0.001   | 0.913 (0.679-1.226)               | 0.543   |
| ADM         | 1.277 (1.115-1.462)           | <0.001  | 1.193 (0.835-1.703)               | 0.332   |
| ADRM1       | 1.225 (1.060-1.417)           | 0.006   | 1.146 (0.84-1.562)                | 0.39    |
| AIMP1       | 1.099 (1.034-1.169)           | 0.003   | 1.144 (0.415-3.155)               | 0.795   |
| AKT1        | 1.267 (1.020-1.573)           | 0.033   | 0.995 (0.754-1.314)               | 0.973   |
| ANGPTL6     | 1.231 (1.035-1.463)           | 0.019   | 1.081 (0.779-1.501)               | 0.64    |
| ARRB1       | 1.336 (1.041-1.715)           | 0.023   | 0.837 (0.479-1.464)               | 0.533   |
| BMP1        | 1.250 (1.121-1.395)           | <0.001  | 1.012 (0.658-1.555)               | 0.957   |
| BMPR1A      | 0.650 (0.457-0.924)           | 0.016   | 0.949 (0.735-1.227)               | 0.69    |
| BRAF        | 0.449 (0.277-0.729)           | 0.001   | 0.978 (0.734-1.304)               | 0.88    |
| CBL         | 0.723 (0.523-0.999)           | 0.049   | 1.163 (0.854-1.585)               | 0.337   |
| CCL26       | 1.359 (1.051-1.759)           | 0.019   | 0.893 (0.473-1.687)               | 0.727   |
| CD14        | 1.216 (1.089-1.357)           | <0.001  | 0.996 (0.738-1.343)               | 0.978   |
| CD320       | 1.199 (1.003-1.432)           | 0.046   | 0.996 (0.733-1.354)               | 0.98    |

## A combined immune-hypoxia model for predicting BRCA radiosensitivity

|        |                       |        |                     |       |
|--------|-----------------------|--------|---------------------|-------|
| CD81   | 1.368 (1.136-1.646)   | 0.001  | 0.984 (0.774-1.251) | 0.895 |
| CMKLR1 | 1.288 (1.045-1.587)   | 0.018  | 0.77 (0.506-1.171)  | 0.221 |
| CMTM6  | 0.625 (0.426-0.916)   | 0.016  | 0.808 (0.621-1.053) | 0.115 |
| CXCL1  | 1.353 (1.008-1.816)   | 0.044  | 0.391 (0.126-1.215) | 0.105 |
| CXCL16 | 0.559 (0.348-0.897)   | 0.016  | 0.893 (0.66-1.21)   | 0.466 |
| DLL4   | 1.319 (1.105-1.576)   | 0.002  | 1.081 (0.838-1.393) | 0.55  |
| EDN2   | 1.335 (1.077-1.655)   | 0.008  | 0.922 (0.705-1.207) | 0.556 |
| ENG    | 1.383 (1.136-1.683)   | 0.001  | 0.825 (0.595-1.145) | 0.25  |
| ESRRA  | 1.271 (1.001-1.612)   | 0.049  | 1.262 (0.968-1.644) | 0.085 |
| F2RL1  | 1.293 (1.050-1.593)   | 0.016  | 1.103 (0.869-1.399) | 0.42  |
| FAM3D  | 1.200 (1.088-1.323)   | <0.001 | 0.806 (0.432-1.503) | 0.497 |
| FCGRT  | 1.263 (1.015-1.571)   | 0.036  | 0.941 (0.703-1.26)  | 0.685 |
| FIGNL2 | 1.359 (1.117-1.654)   | 0.002  | 0.982 (0.751-1.284) | 0.895 |
| FLT4   | 1.235 (1.024-1.490)   | 0.027  | 0.834 (0.589-1.182) | 0.308 |
| GDF11  | 1.283 (1.040-1.582)   | 0.02   | 0.924 (0.666-1.282) | 0.637 |
| GDF3   | 1.213 (1.007-1.462)   | 0.042  | 1.185 (0.871-1.612) | 0.279 |
| GFAP   | 1.257 (1.080-1.462)   | 0.003  | 0.689 (0.355-1.338) | 0.271 |
| GRN    | 1.216 (1.014-1.458)   | 0.035  | 1.084 (0.792-1.482) | 0.614 |
| HRAS   | 1.249 (1.000-1.559)   | 0.05   | 0.932 (0.652-1.333) | 0.701 |
| IL1A   | 1.197 (1.099-1.303)   | <0.001 | 0.378 (0.052-2.767) | 0.338 |
| IL31RA | 1.240 (1.092-1.406)   | 0.001  | 1.135 (0.816-1.577) | 0.452 |
| KLRC2  | 0.208 (0.047-0.920)   | 0.039  | 1.09 (0.876-1.355)  | 0.44  |
| KLRC3  | 0.118 (0.021-0.646)   | 0.014  | 1.018 (0.892-1.161) | 0.793 |
| LGR4   | 1.226 (1.001-1.501)   | 0.049  | 0.876 (0.641-1.197) | 0.405 |
| LMBR1L | 1.371 (1.053-1.785)   | 0.019  | 0.999 (0.758-1.317) | 0.996 |
| MAP2K2 | 1.267 (1.012-1.586)   | 0.039  | 0.942 (0.676-1.313) | 0.726 |
| MMP9   | 1.160 (1.076-1.250)   | <0.001 | 0.27 (0.012-6.208)  | 0.413 |
| MUC4   | 14.333 (2.951-69.624) | 0.001  | 0.941 (0.534-1.659) | 0.833 |
| NCK1   | 0.550 (0.352-0.859)   | 0.009  | 0.998 (0.798-1.248) | 0.984 |
| NFAT5  | 0.682 (0.475-0.980)   | 0.039  | 0.973 (0.729-1.299) | 0.852 |
| NR1D1  | 1.168 (1.002-1.360)   | 0.047  | 1.046 (0.808-1.353) | 0.734 |
| NR1H2  | 1.433 (1.121-1.832)   | 0.004  | 0.936 (0.718-1.22)  | 0.624 |
| NR2F1  | 1.155 (1.021-1.308)   | 0.023  | 0.783 (0.441-1.39)  | 0.404 |
| OGFR   | 1.330 (1.045-1.692)   | 0.021  | 0.827 (0.606-1.127) | 0.228 |
| PAK6   | 1.475 (1.195-1.821)   | <0.001 | 1.166 (0.931-1.462) | 0.181 |
| PDGFRB | 1.402 (1.127-1.743)   | 0.002  | 1.094 (0.807-1.482) | 0.564 |
| PGF    | 1.273 (1.147-1.412)   | <0.001 | 1.169 (0.865-1.58)  | 0.31  |
| PIK3CA | 1.137 (1.063-1.215)   | <0.001 | 1.38 (0.616-3.094)  | 0.434 |
| PLAU   | 1.252 (1.064-1.473)   | 0.007  | 1.266 (0.939-1.708) | 0.122 |
| PLTP   | 1.199 (1.072-1.340)   | 0.001  | 1.234 (0.94-1.619)  | 0.13  |
| PLXND1 | 1.726 (1.377-2.164)   | <0.001 | 1.138 (0.907-1.429) | 0.263 |
| PPARA  | 0.541 (0.349-0.840)   | 0.006  | 1.047 (0.848-1.292) | 0.668 |
| PSMC6  | 1.238 (1.033-1.485)   | 0.021  | 0.782 (0.528-1.159) | 0.221 |
| PTGDS  | 1.152 (1.071-1.239)   | <0.001 | 0.228 (0.04-1.312)  | 0.098 |
| PTGER1 | 1.283 (1.089-1.510)   | 0.003  | 0.907 (0.562-1.464) | 0.689 |
| QRFP   | 1.330 (1.106-1.599)   | 0.002  | 1.019 (0.754-1.378) | 0.904 |
| RABEP2 | 1.284 (1.007-1.638)   | 0.044  | 0.954 (0.675-1.349) | 0.791 |
| RAET1E | 1.427 (1.104-1.843)   | 0.007  | 1.119 (0.74-1.693)  | 0.595 |
| RFX5   | 0.667 (0.459-0.971)   | 0.035  | 0.998 (0.779-1.28)  | 0.989 |
| RNASE7 | 1.177 (1.045-1.325)   | 0.007  | 0.557 (0.24-1.292)  | 0.173 |
| RXFP1  | 1.222 (1.005-1.486)   | 0.044  | 0.94 (0.621-1.423)  | 0.771 |

A combined immune-hypoxia model for predicting BRCA radiosensitivity

|          |                     |        |                     |       |
|----------|---------------------|--------|---------------------|-------|
| S100A3   | 1.297 (1.170-1.437) | <0.001 | 0.881 (0.596-1.303) | 0.526 |
| SEMA7A   | 1.514 (1.298-1.767) | <0.001 | 0.886 (0.598-1.314) | 0.547 |
| SOD1     | 1.284 (1.044-1.579) | 0.018  | 1.08 (0.875-1.333)  | 0.473 |
| STAT3    | 0.681 (0.475-0.976) | 0.036  | 0.94 (0.722-1.226)  | 0.649 |
| TGFB1    | 1.195 (1.018-1.402) | 0.03   | 0.736 (0.502-1.079) | 0.117 |
| TGFB2    | 0.459 (0.256-0.823) | 0.009  | 1.053 (0.791-1.403) | 0.722 |
| THPO     | 1.340 (1.037-1.731) | 0.025  | 0.968 (0.804-1.164) | 0.729 |
| TIE1     | 1.224 (1.020-1.470) | 0.03   | 0.896 (0.646-1.241) | 0.508 |
| TINAGL1  | 1.382 (1.080-1.768) | 0.01   | 1.084 (0.86-1.366)  | 0.497 |
| TMSB10   | 1.325 (1.075-1.633) | 0.008  | 0.96 (0.707-1.304)  | 0.794 |
| TNFRSF4  | 1.392 (1.154-1.678) | 0.001  | 0.866 (0.62-1.209)  | 0.397 |
| TNFRSF6B | 1.268 (1.107-1.452) | 0.001  | 0.734 (0.475-1.134) | 0.164 |
| TOR2A    | 1.347 (1.045-1.735) | 0.021  | 0.932 (0.706-1.23)  | 0.618 |
| TRPC4AP  | 1.185 (1.026-1.368) | 0.021  | 0.978 (0.626-1.526) | 0.921 |
| UNC93B1  | 1.236 (1.052-1.452) | 0.01   | 1.081 (0.833-1.404) | 0.556 |
| VIP      | 1.215 (1.054-1.400) | 0.007  | 0.73 (0.472-1.129)  | 0.157 |
| HRGs     |                     |        |                     |       |
| BGN      | 1.205 (1.012-1.434) | 0.036  | 1.005 (0.696-1.451) | 0.978 |
| CDKN1A   | 1.283 (1.012-1.625) | 0.039  | 0.822 (0.567-1.191) | 0.301 |
| CP       | 1.253 (1.074-1.462) | 0.004  | 1.096 (0.832-1.443) | 0.516 |
| GBE1     | 0.648 (0.428-0.981) | 0.04   | 1.06 (0.863-1.301)  | 0.579 |
| GPC1     | 1.195 (1.061-1.345) | 0.003  | 1.008 (0.581-1.749) | 0.978 |
| KDM3A    | 0.624 (0.404-0.964) | 0.033  | 1.188 (0.982-1.436) | 0.076 |
| MT2A     | 1.247 (1.035-1.503) | 0.02   | 0.775 (0.504-1.192) | 0.246 |
| NAGK     | 1.326 (1.030-1.706) | 0.028  | 1.2 (0.98-1.47)     | 0.078 |
| PRDX5    | 1.288 (1.042-1.591) | 0.019  | 1.046 (0.801-1.367) | 0.741 |
| S100A4   | 1.162 (1.043-1.294) | 0.007  | 1.045 (0.691-1.582) | 0.833 |
| SERPINE1 | 1.311 (1.169-1.471) | <0.001 | 0.817 (0.57-1.172)  | 0.273 |
| SLC25A1  | 1.332 (1.014-1.751) | 0.039  | 1.05 (0.824-1.337)  | 0.694 |
| SRPX     | 1.355 (1.163-1.578) | <0.001 | 0.92 (0.611-1.387)  | 0.692 |
| TGFBI    | 1.296 (1.143-1.470) | <0.001 | 1.112 (0.768-1.61)  | 0.575 |

**Table S6.** Coefficients of spike-and-slab Lasso Cox and Lasso Cox models

| Gene names | Coefficients |
|------------|--------------|
| IRGs       |              |
| PAK6       | 0.364613574  |
| PLXND1     | 0.435054147  |
| SEMA7A     | 0.251088237  |
| HRGs       |              |
| BGN        | 0.020302494  |
| CP         | 0.207320903  |
| GBE1       | -0.373751049 |
| GPC1       | 0.031078184  |
| KDM3A      | -0.032321533 |
| NAGK       | 0.005800813  |
| S100A4     | 0.083597029  |
| SERPINE1   | 0.199830708  |
| SLC25A1    | 0.117815068  |
| SRPX       | 0.108774567  |
| TGFBI      | 0.000371747  |

A combined immune-hypoxia model for predicting BRCA radiosensitivity

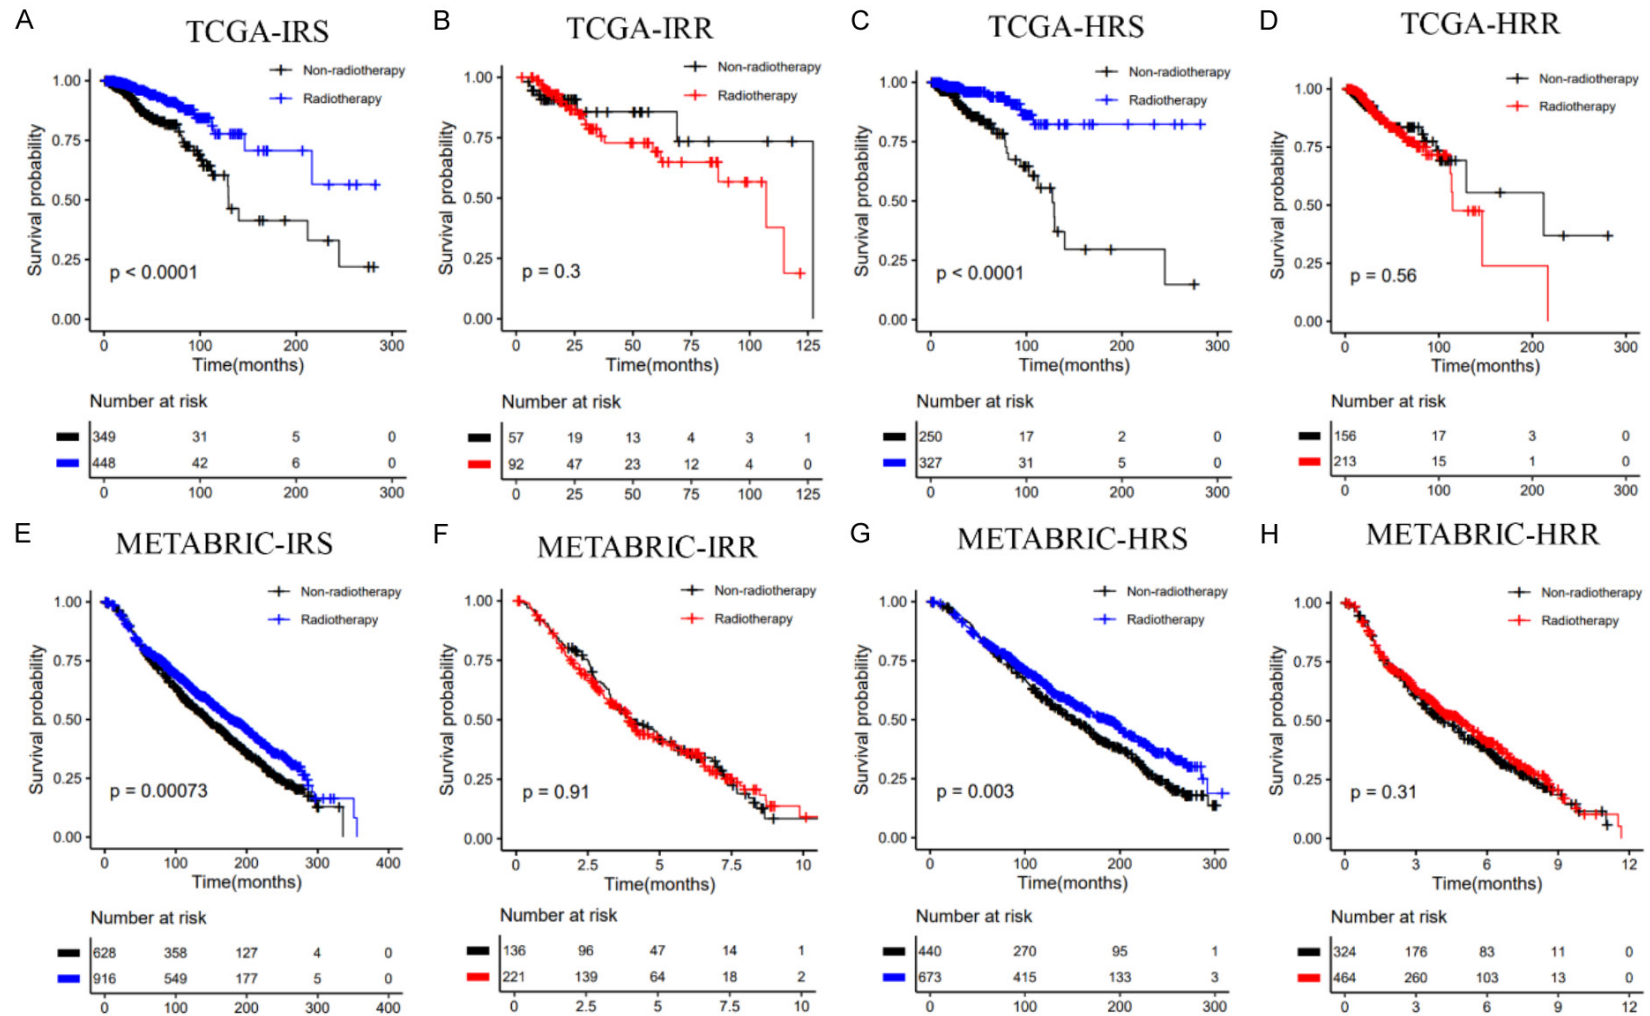

**Figure S4.** Kaplan-Meier curves of OS for patients who had received radiation vs. those who did not: A. TCGA-IRS group; B. TCGA-IRR group; C. TCGA-HRS group; D. TCGA-HRR group; E. METABRIC-IRS group; F. METABRIC-IRR group; G. METABRIC-HRS group; H. METABRIC-HRR group.



A combined immune-hypoxia model for predicting BRCA radiosensitivity

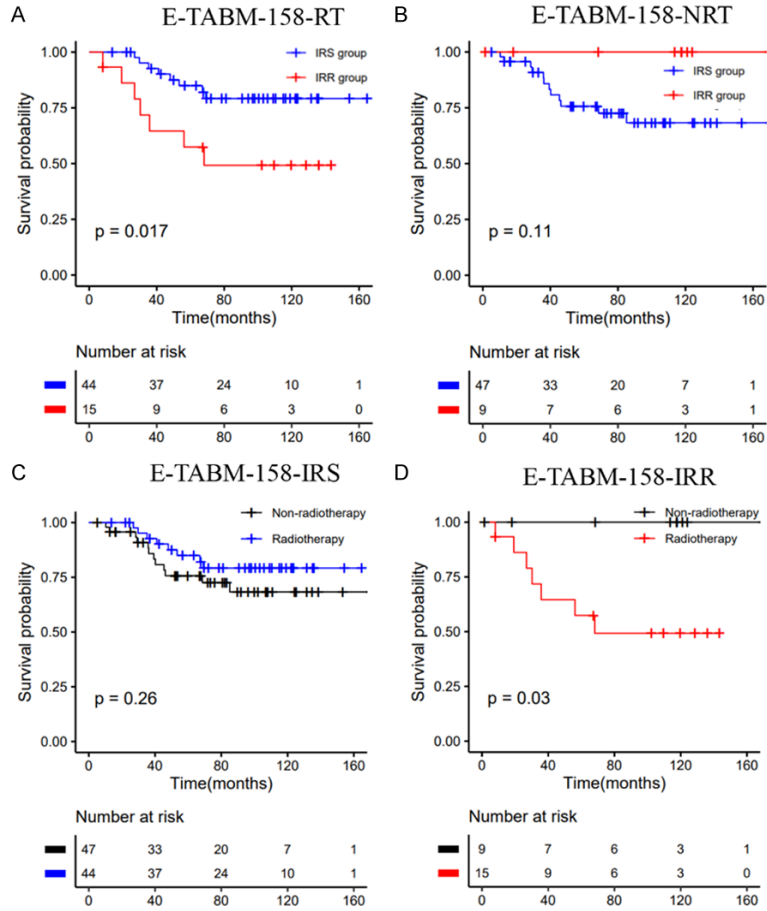

Figure S5. Disease-specific survival stratified by the immune signatures in the E-TABM-158 dataset.



A combined immune-hypoxia model for predicting BRCA radiosensitivity

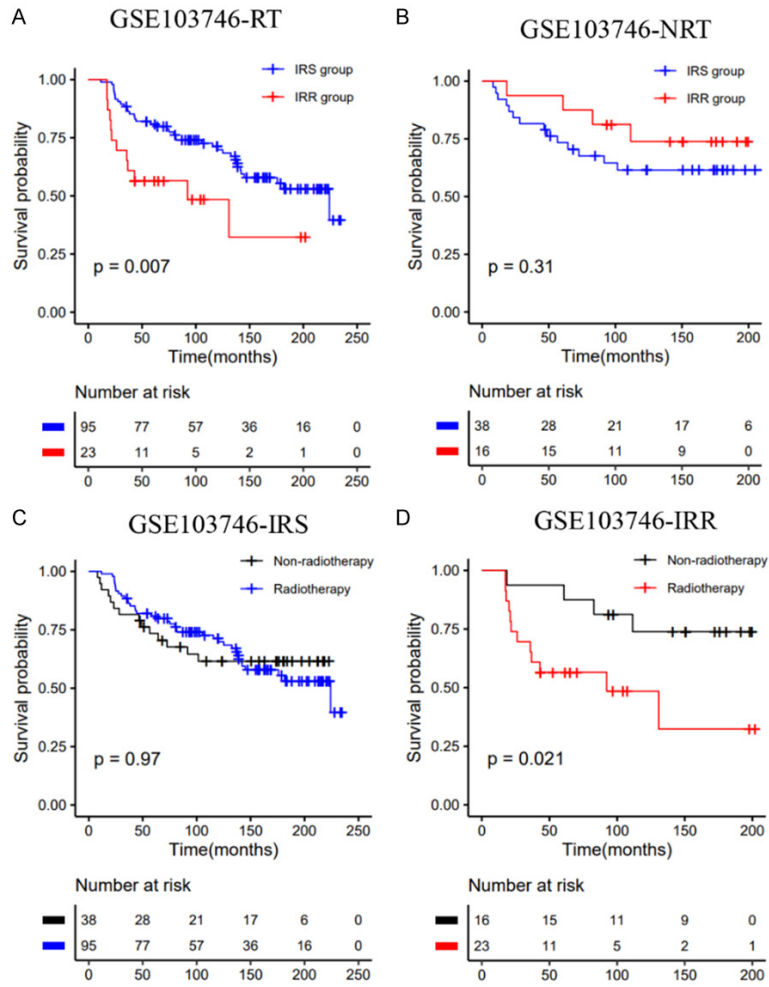

Figure S6. Recurrence-free survival stratified by the immune signatures in the GSE103746 dataset.

A combined immune-hypoxia model for predicting BRCA radiosensitivity

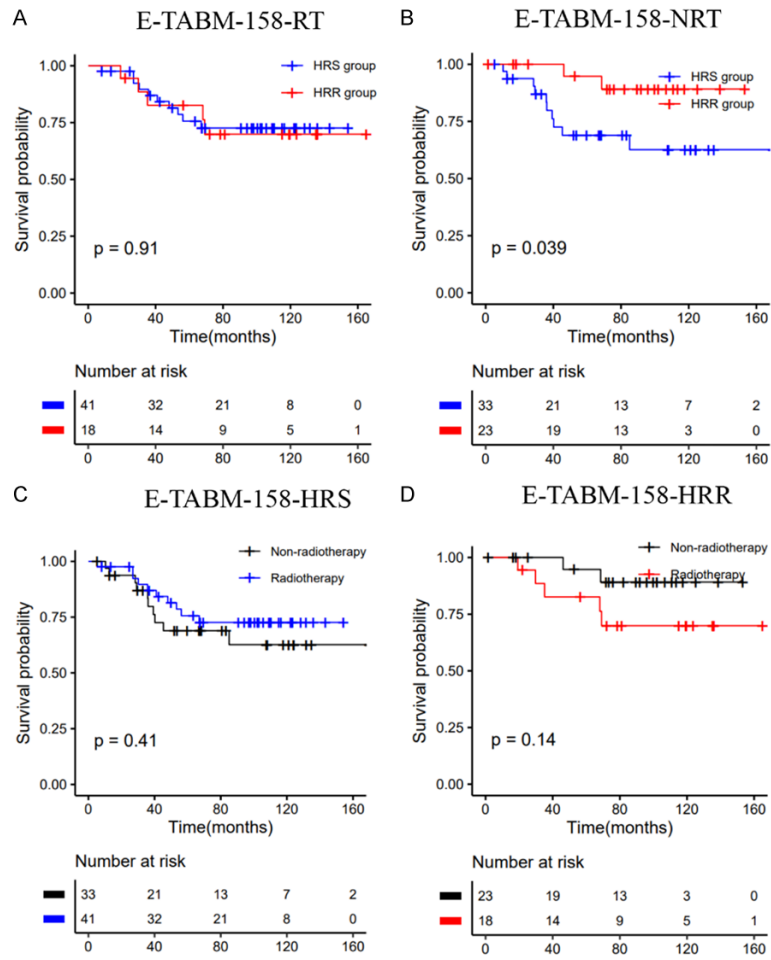

Figure S7. Recurrence-free survival stratified by the hypoxia signatures in the E-TABM-158 dataset.

A combined immune-hypoxia model for predicting BRCA radiosensitivity

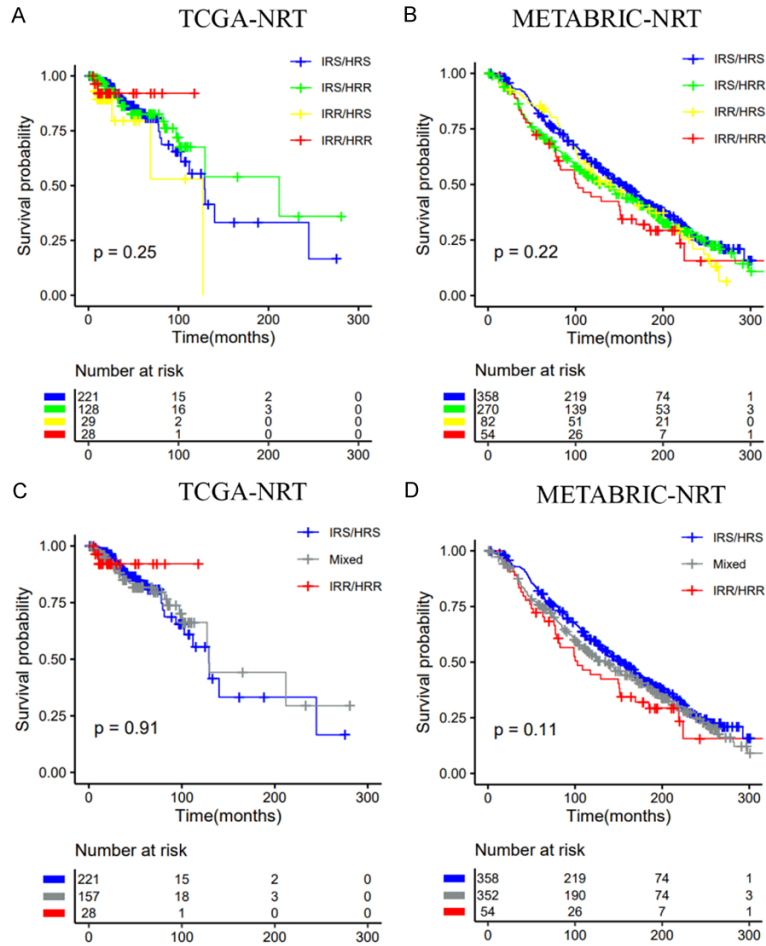

**Figure S8.** Classification of nonradiotherapy patients into subgroups according to the immune signature (IRS vs. IRR) and the hypoxia signature (HRS vs. HRR). A, C. TCGA dataset; B, D. METABRIC dataset.

A combined immune-hypoxia model for predicting BRCA radiosensitivity

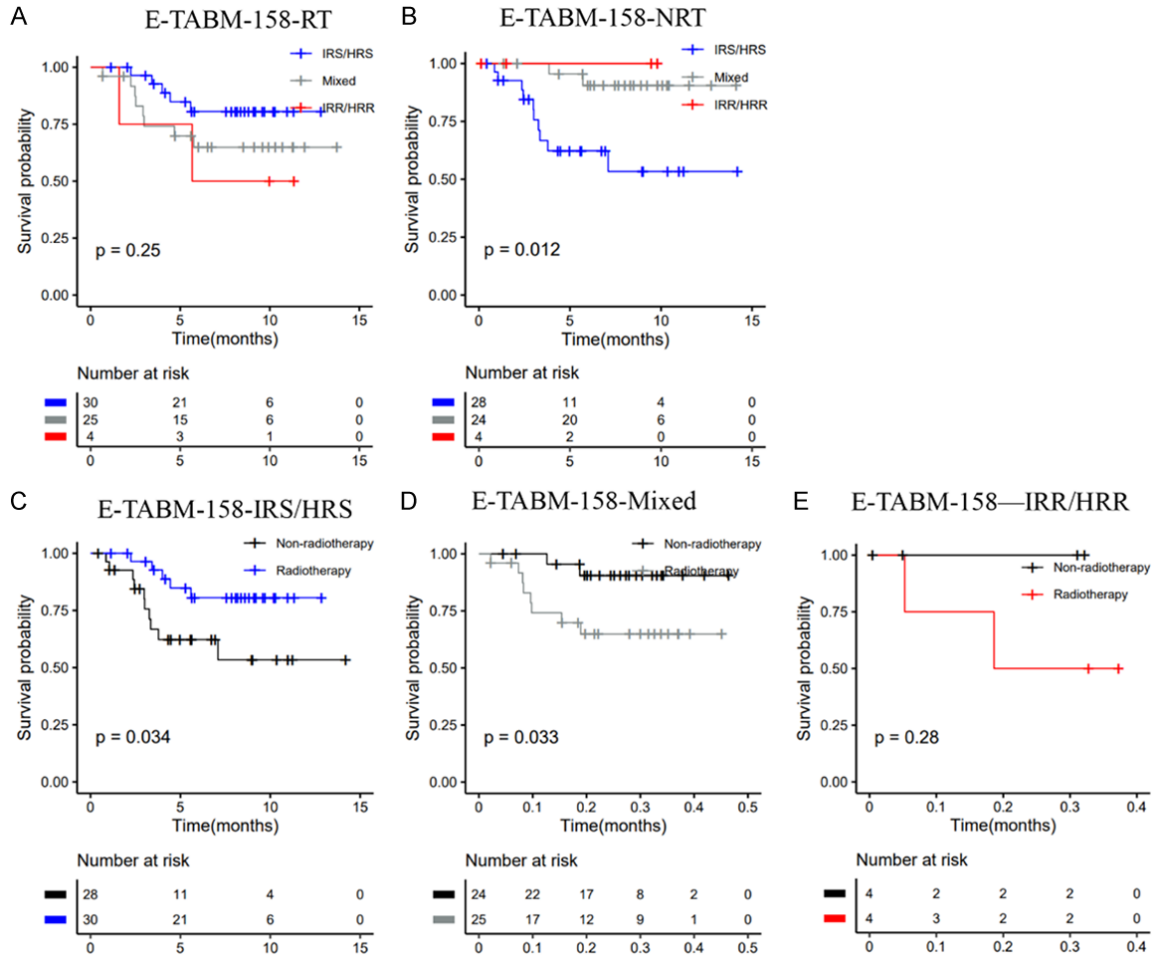

**Figure S9.** Classification of patients into subgroups according to the immune signature (IRS vs. IRR) and the hypoxia signature (HRS vs. HRR) in the E-TABM-158 dataset.

A combined immune-hypoxia model for predicting BRCA radiosensitivity

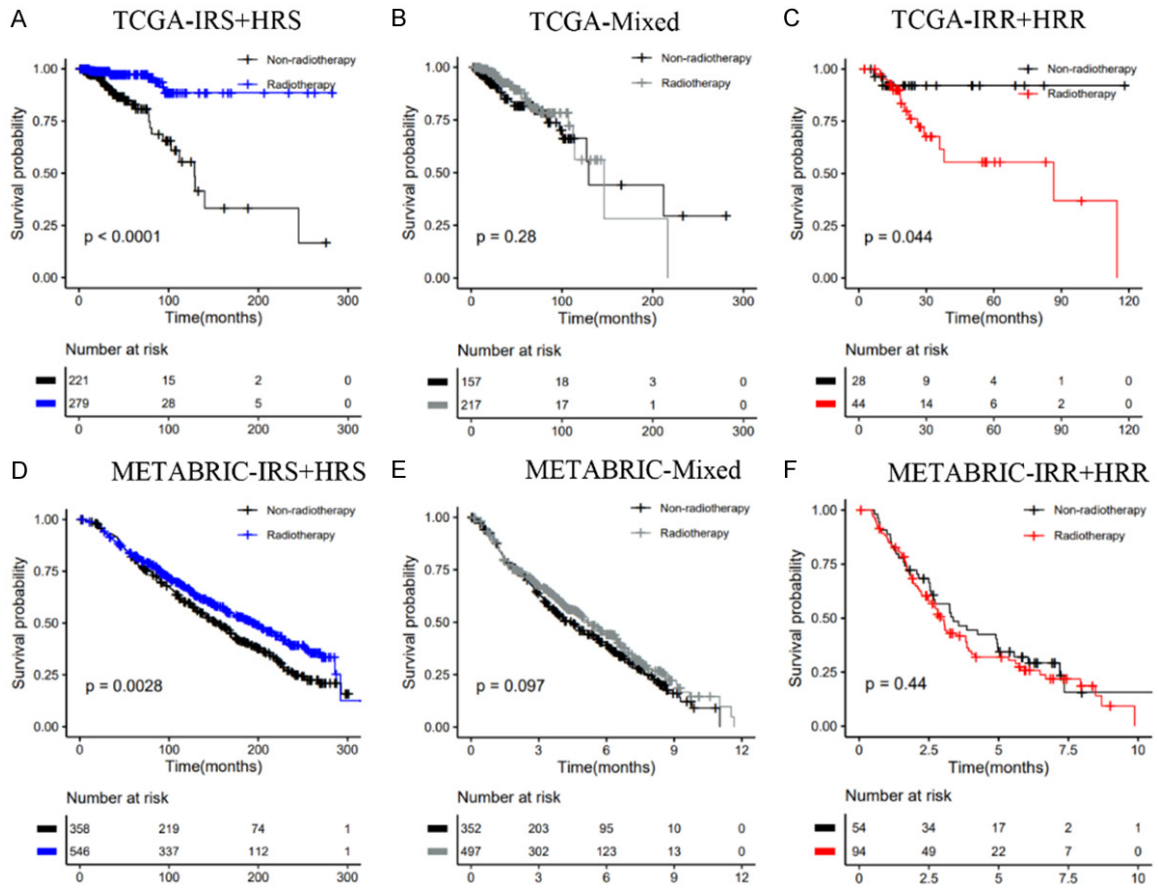

**Figure S10.** Overall survival stratified by the combination of immune and hypoxia gene signatures. A-C. TCGA dataset; D-F. METABRIC dataset.

A combined immune-hypoxia model for predicting BRCA radiosensitivity

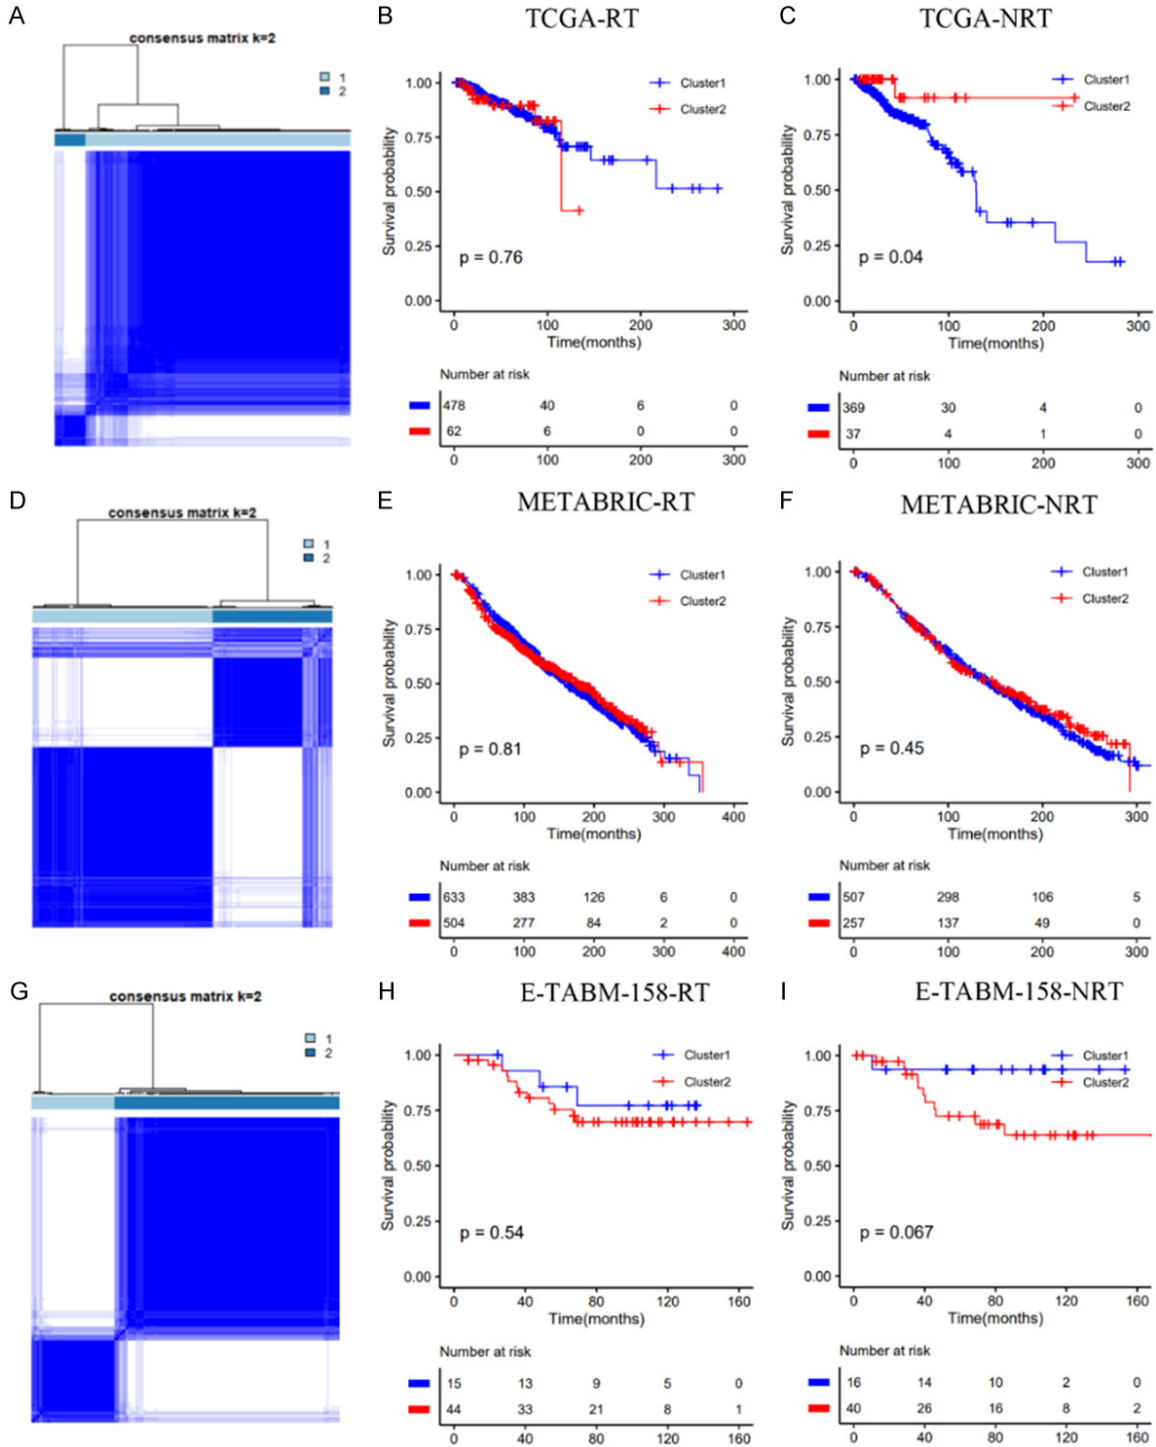

**Figure S11.** Validation of 31-gene in the TCGA, METABRIC, E-TABM-158 datasets. A, D, G. Consensus clustering algorithm generated two clusters based on the expression profile of the 31-gene signature; B, C. Kaplan-Meier plot of OS for the two clusters in the TCGA dataset; E, F. Kaplan-Meier plot of OS for the two clusters in the METABRIC dataset; H, I. Kaplan-Meier plot of DSS for the two clusters in the E-TABM-158 dataset.

A combined immune-hypoxia model for predicting BRCA radiosensitivity

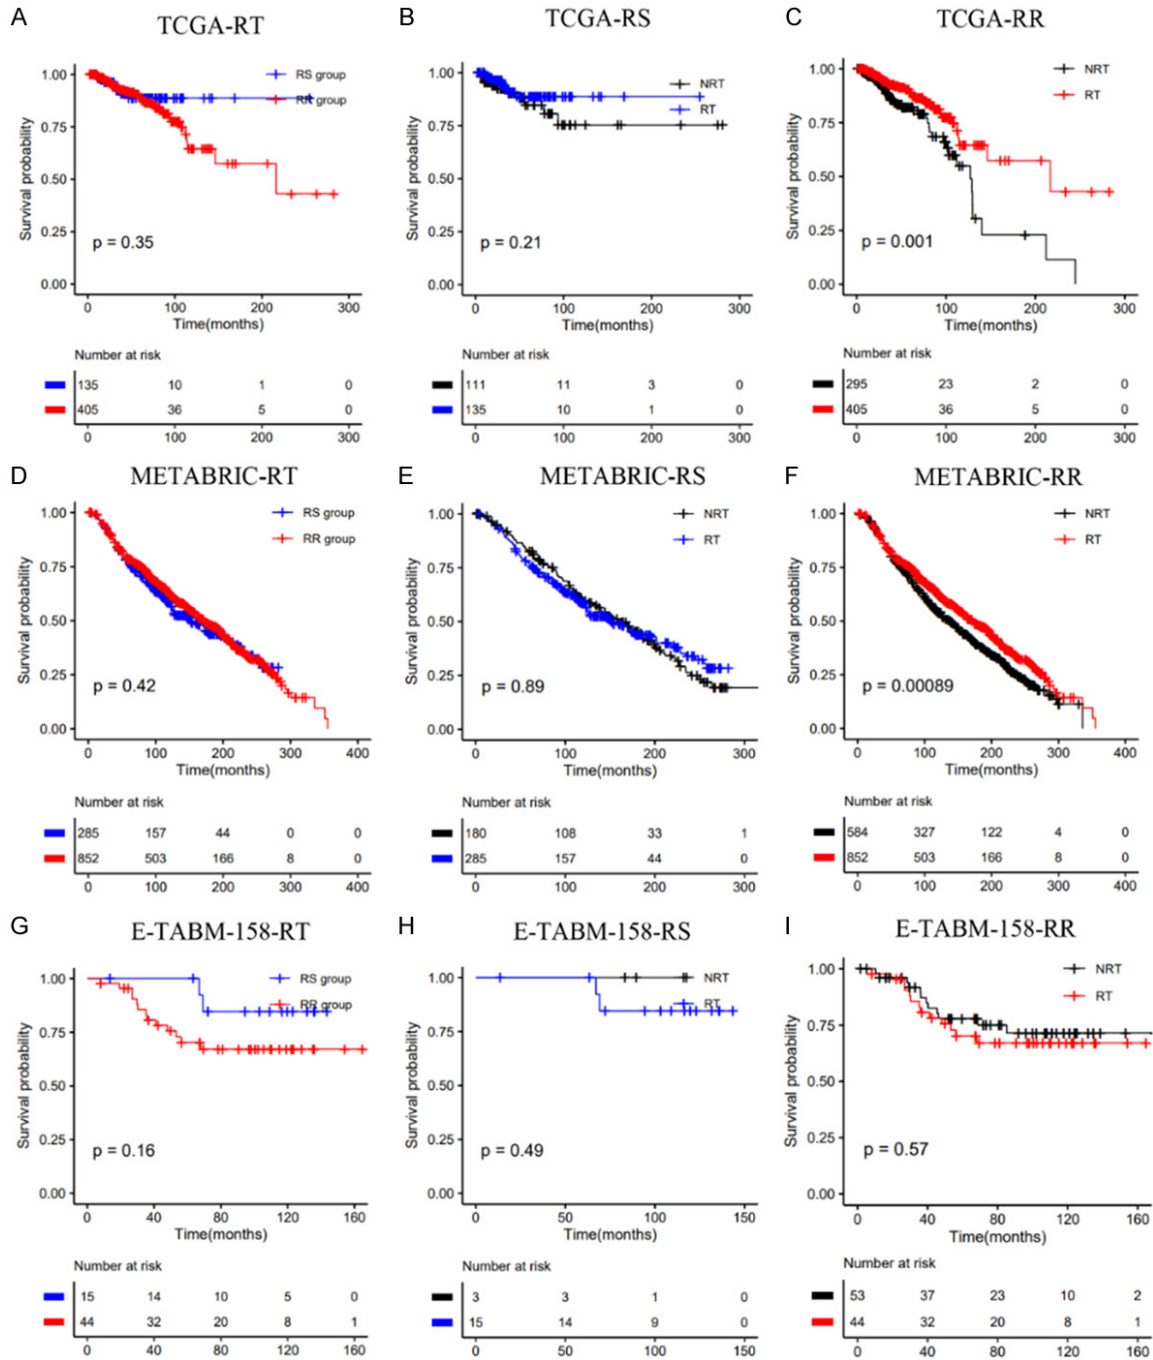

Figure S12. Validation of RSI in the TCGA, METABRIC, E-TABM-158 datasets.



# A combined immune-hypoxia model for predicting BRCA radiosensitivity

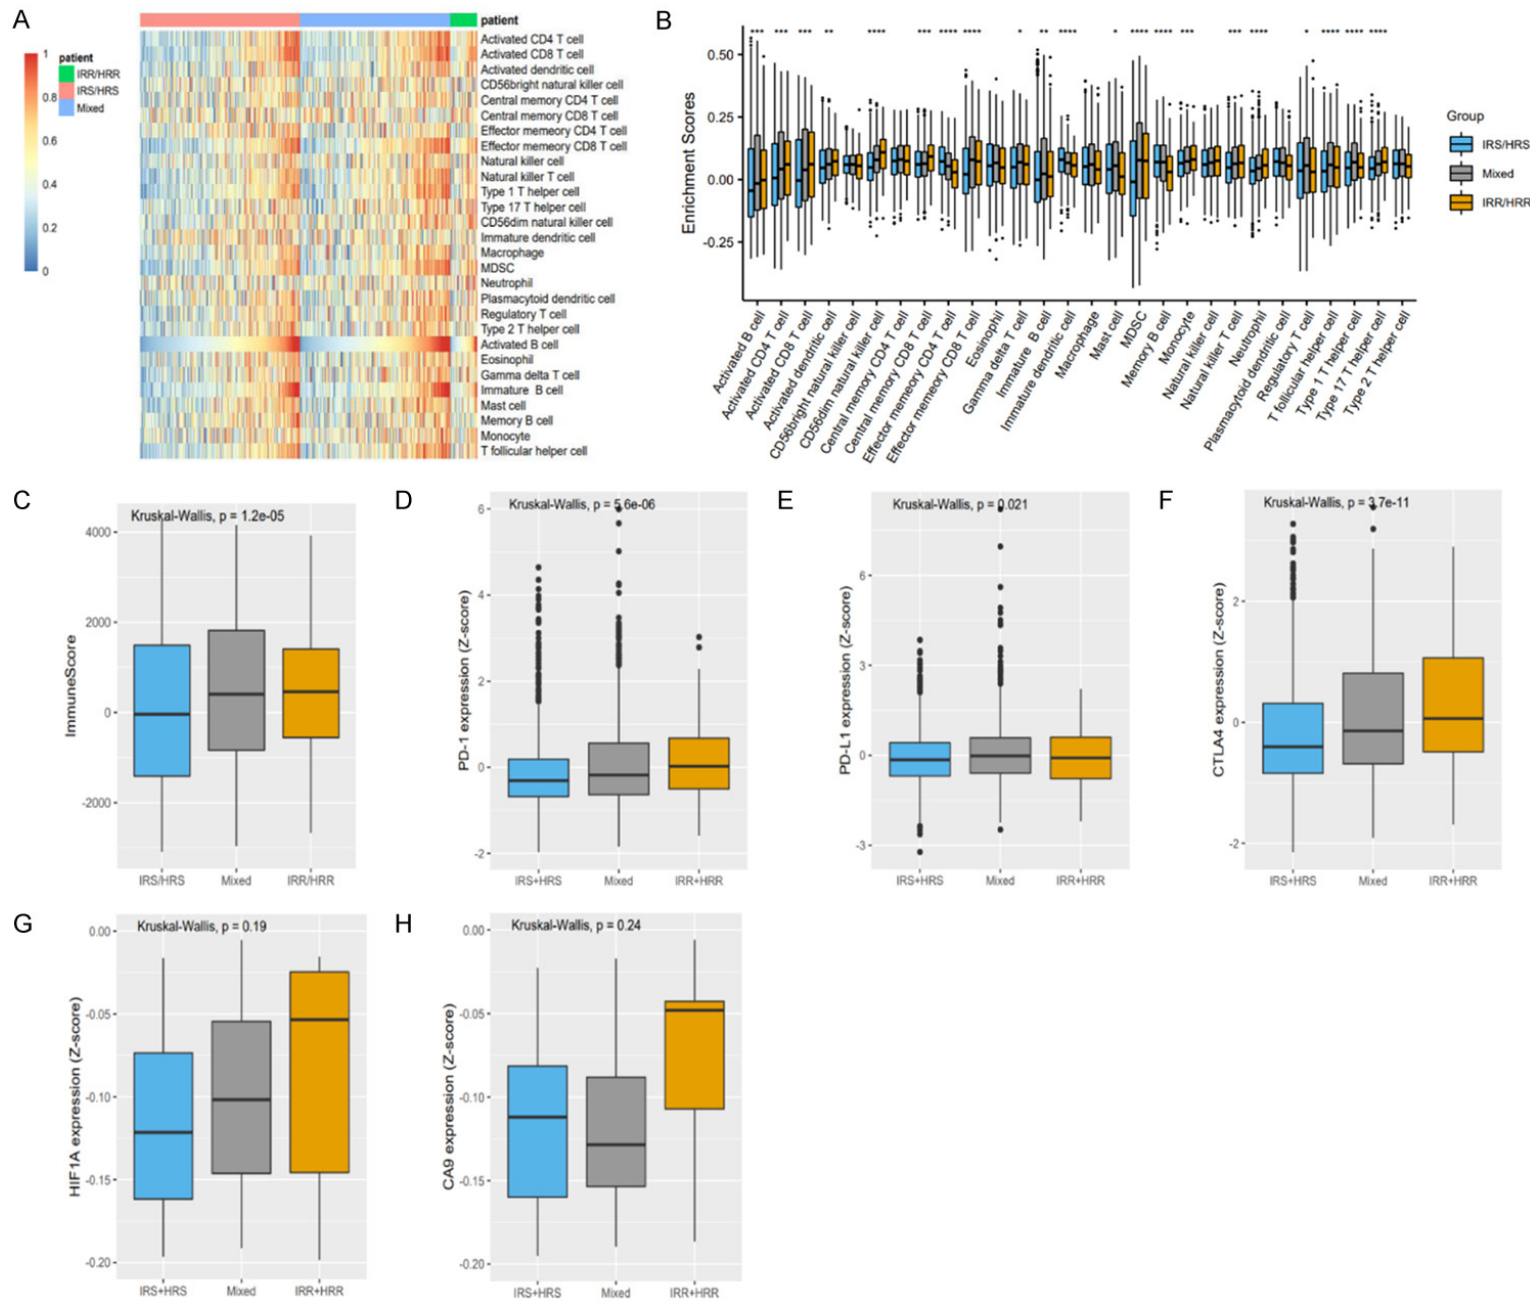

## A combined immune-hypoxia model for predicting BRCA radiosensitivity

**Figure S13.** Immune microenvironment of these three groups (IRS/HRS, Mixed, IRR/HRR) in the METABRIC dataset. A, B. ssGSEA analysis showed the immune cell proportions of three groups; C-F. Comparison of immune score, PD-1, PDL-1, CTLA-4 levels of three groups in all patients; G, H. Comparison of HIF-a, CA9 expression levels of three groups in radiotherapy patients.

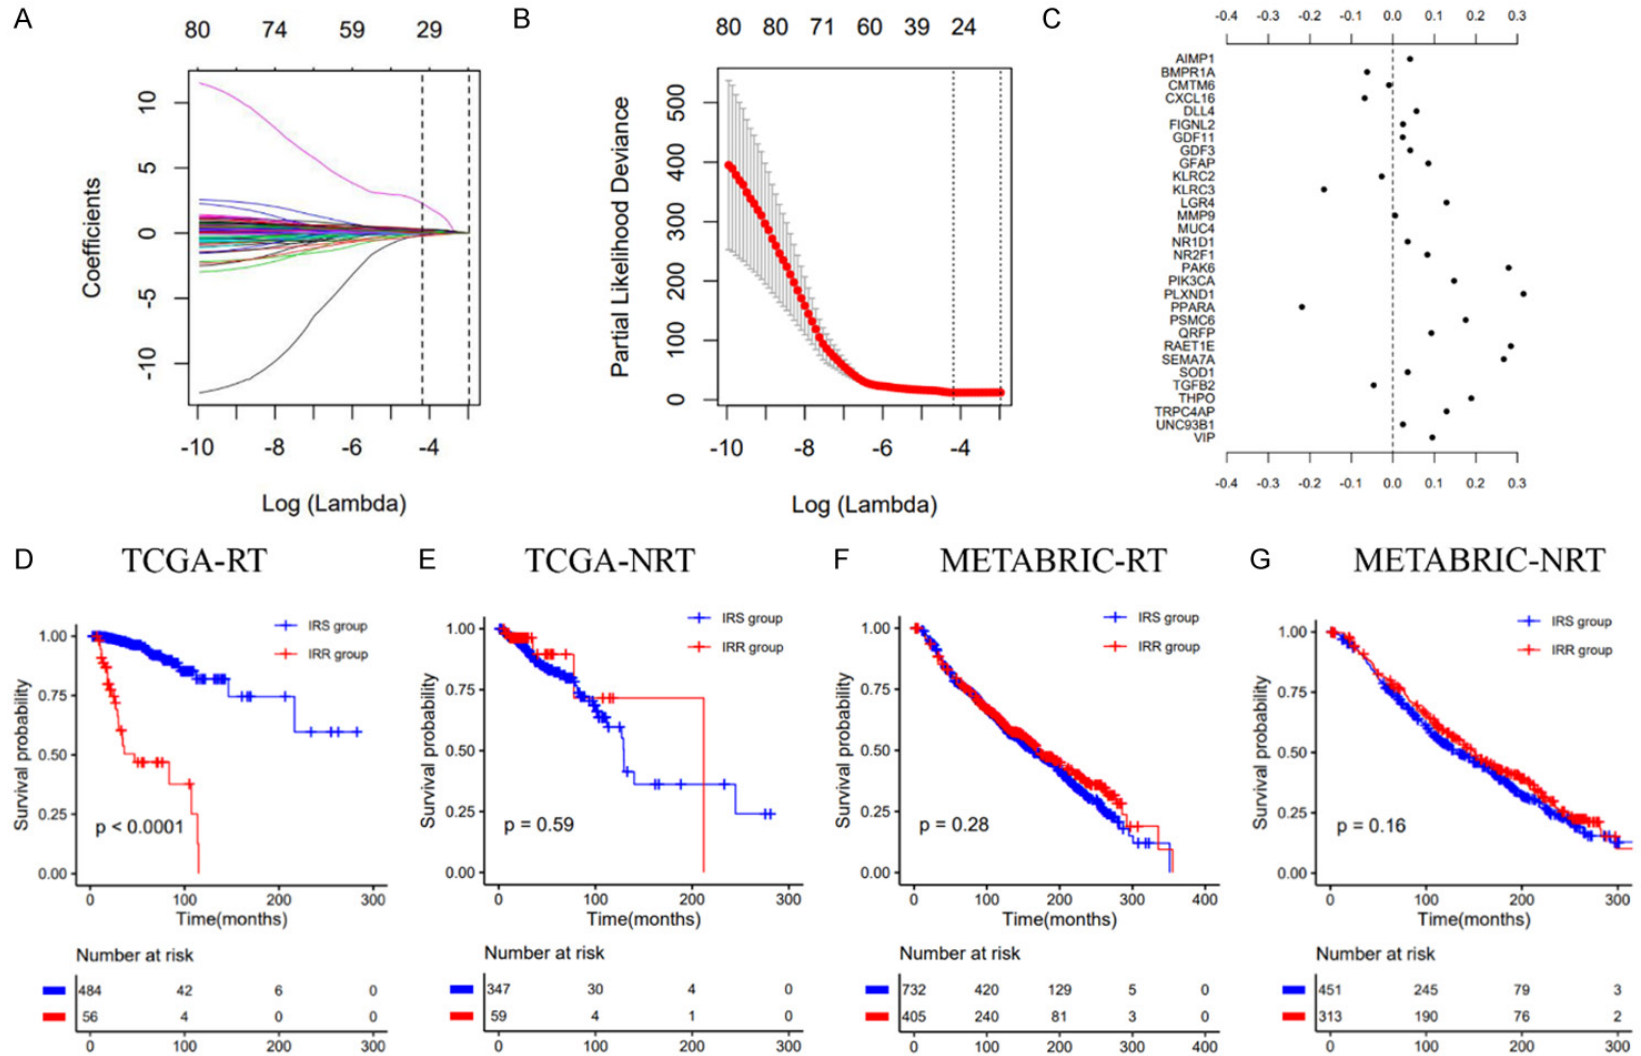

**Figure S14.** A-C. Candidate immune genes selection by Lasso Cox analysis; D-G. Kaplan-Meier survival curves of the IRS group and IRR group in radiotherapy patients and non-radiotherapy patients, respectively.

# A combined immune-hypoxia model for predicting BRCA radiosensitivity

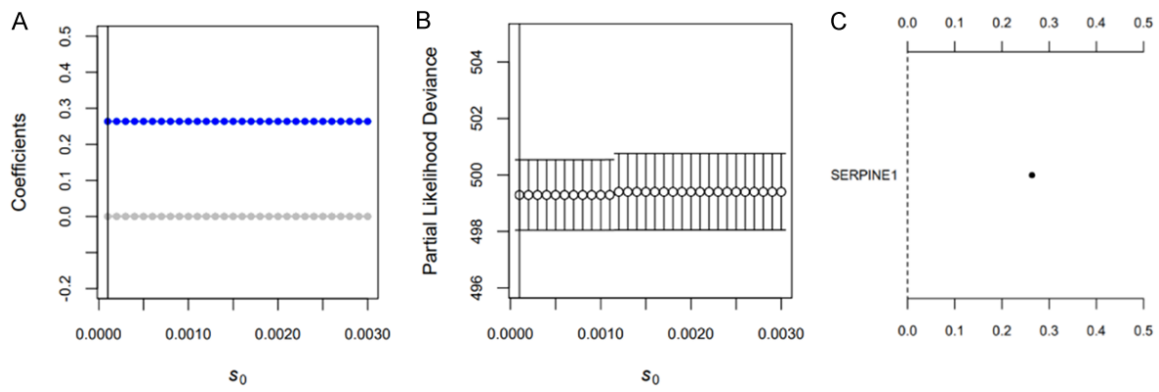

**Figure S15.** A-C. Candidate hypoxia genes selection by spike-and-slab Lasso Cox analysis.
